# Supplementary material
Source: Research Square preprint supplement (doi:10.21203/rs.3.rs-9967642/v2)
Supplement: Supplementary file 1 [file 259e52b05efdeba326deb4e0.docx]

**SUPPLEMENTARY MATERIAL**

In Table S1, the statistical tests indicated that the time series were non-stationary in levels. To test for cointegration, the Engle–Granger two-step procedure was applied. First, a long-run equilibrium relationship was estimated by regressing the time series. In the second step, the residuals from the cointegration regression were tested for stationarity using the ADF test. The results indicated that the residuals are stationary (t = -2.627, *p* = .009). Therefore, the variables are cointegrated, suggesting the existence of a stable long-run equilibrium relationship among cigarettes sales, price and wage.

| **Table S1**  *ADF tests of time series variables* | | |
| --- | --- | --- |
|  | Level | |
|  | t | *p* |
| Cigarettes sales | -0.707 | .973 |
| Cigarette price | -2.552 | .302 |
| Wage | -1.502 | .828 |
| *Note*. Maximum lag length = 12 | | |

Given evidence of residual autocorrelation based on Breusch–Godfrey tests (Table S2), which persists even after including multiple lags and indicates long-memory dynamics, we report Newey–West standard errors allowing for autocorrelation up to 12 lags to ensure robust inference.

| **Table S2**  *Breusch-Godfrey test for autocorrelation in baseline model* | | |
| --- | --- | --- |
| Lags (p) | χ2 | *p* |
| 1 | 5.308 | .002 |
| 2 | 5.317 | .007 |
| 3 | 61.251 | < .001 |
| 4 | 61.856 | < .001 |
| 5 | 62.249 | < .001 |
| 6 | 68.381 | < .001 |
| 7 | 69.672 | < .001 |
| 8 | 69.682 | < .001 |
| 9 | 69.923 | < .001 |
| 10 | 73.610 | < .001 |
| 11 | 73.640 | < .001 |
| 12 | 73.640 | < .001 |
|  | | |

The specific excise tax was strongly correlated with cigarette prices (r = .970, *p* < .001). First-stage regressions indicated a strong association between the instrument and cigarette prices (F = 136.5, p < .001), exceeding the conventional threshold for weak instruments (F > 10). Durbin–Wu–Hausman tests did not provide evidence of price endogeneity (*p* = .13). Consequently, IV estimates were used as a robustness check, while the main analyses relied on the baseline Newey–West specifications. Table S3 presents the IV estimates. Results were broadly consistent with those obtained in the baseline model, although the estimated price coefficient was somewhat larger in magnitude.

| **Table S3**  *Instrumental variables 2SLS regression vs baseline Newey-West regression* | | | | | | | |
| --- | --- | --- | --- | --- | --- | --- | --- |
|  | *IV* | | | *Baseline* | | | |
| Variable | Estimate | *z* | *p* | Estimate | *t* | *p* |
| Price | -1.016 | -5.53 | < .001 | -0.800 | -6.32 | < .001 |
| Wage | 1.071 | 5.35 | < .001 | 0.856 | 4.31 | < .001 |
| Act 28/2005 | 0.061 | 1.82 | .069 | 0.040 | 1.80 | .073 |
| Act 42/2010 | 0.016 | 0.35 | .724 | -0.032 | -0.90 | .370 |
| COVID | -0.172 | -2.79 | .005 | -0.161 | -7.30 | < .001 |
| Trend | -0.002 | -5.09 | < .001 | -0.002 | -3.60 | < .001 |
| Lag (t-1) | 0.186 | 2.32 | .020 | 0.248 | 2.82 | .005 |
| Note. 2SLS = two-stage least squares. IV = instrumental variable. | | | | | | | |

Model specification tests did not indicate misspecification of the functional form in either the overall demand model or the segment-specific models. The RESET test was not statistically significant for the overall cigarette demand model (F = 1.49, *p* = .219), the low-price segment model (F = 1.54, *p* = .204), the medium-price segment model (F = 1.88, *p* = .134), or the high-price segment model (F = 0.61, *p* = .609).

| **Table S4**  *Seemingly unrelated regression estimates for cigarette price segments.* | | | | | | | | | |
| --- | --- | --- | --- | --- | --- | --- | --- | --- | --- |
|  | Low-price segment | | | Medium-price segment | | | High-price segment | | | |
| Variable | Estimate | *t* | *p* | Estimate | *t* | *p* | Estimate | *t* | *p* | |
| Price | -0.369 | -3.28 | .001 | -00.200 | -2.37 | .018 | -1.066 | -8.15 | < .001 | |
| Wage | 0.030 | 0.19 | .848 | .752 | 5.08 | < .001 | 0.666 | 4.47 | < .001 | |
| Act 28/2005 | -0.194 | -3.55 | < .001 | 0.074 | 2.37 | .018 | 0.006 | 0.21 | .833 | |
| Act 42/2010 | 0.019 | 0.36 | .716 | -0.053 | -1.52 | .128 | 0.055 | 1.60 | .111 | |
| COVID | -0.122 | -1.71 | .087 | -0.109 | -2.32 | .020 | -0.196 | -3.75 | < .001 | |
| Trend | 0.003 | 4.47 | < .001 | -0.004 | -6.90 | < .001 | 0.001 | 3.17 | .002 | |
| Lag (t-1) | 0.714 | 19.05 | < .001 | 0.545 | 11.00 | < .001 | 0.501 | 10.85 | < .001 | |
